# Supplementary material for: Androgen deprivation induces neuroendocrine phenotypes in prostate cancer cells through CREB1/EZH2-mediated downregulation of REST
Source: PubMed Central journal article supplement (PMC11111810; doi:10.1038/s41420-024-02031-1), 2024-05-22

# Appendix Fig. 1

## Fig. 1 A

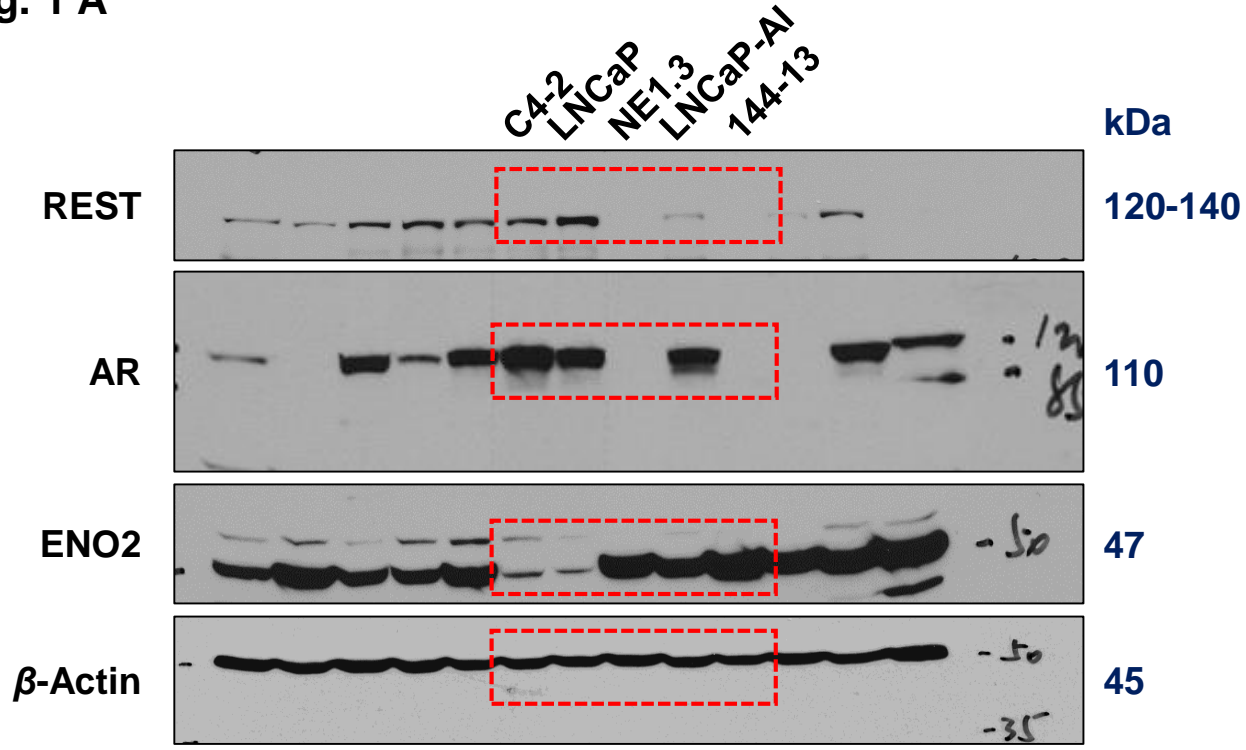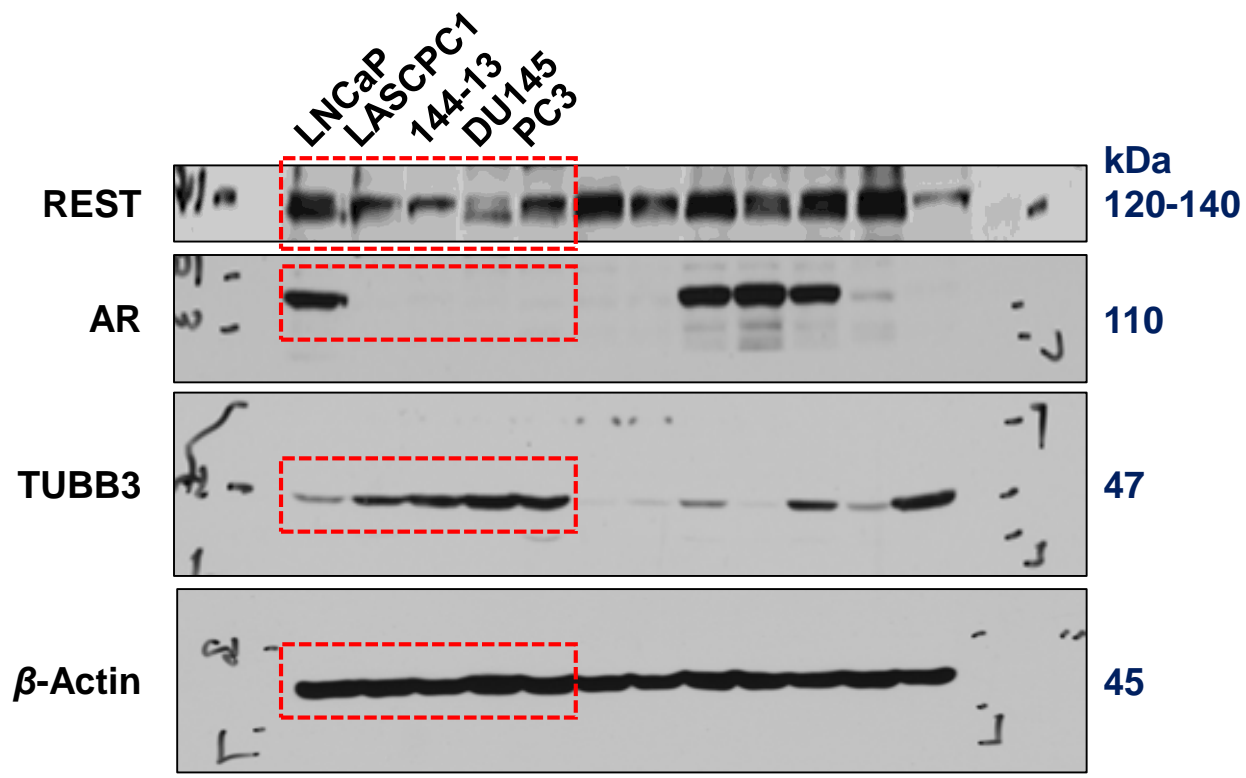

# Appendix Fig. 2

Fig. 2 A

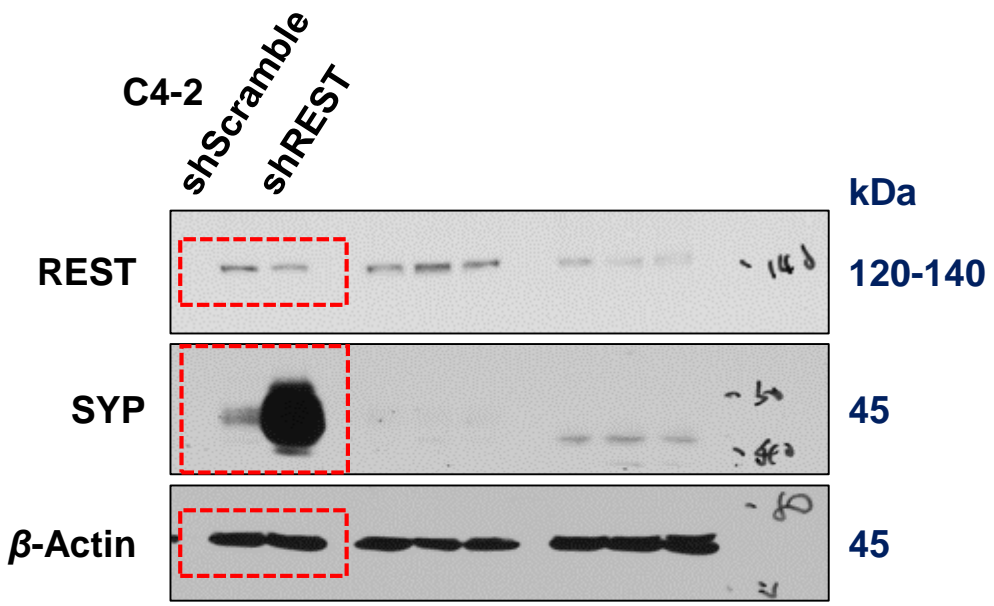

Fig. 2 B

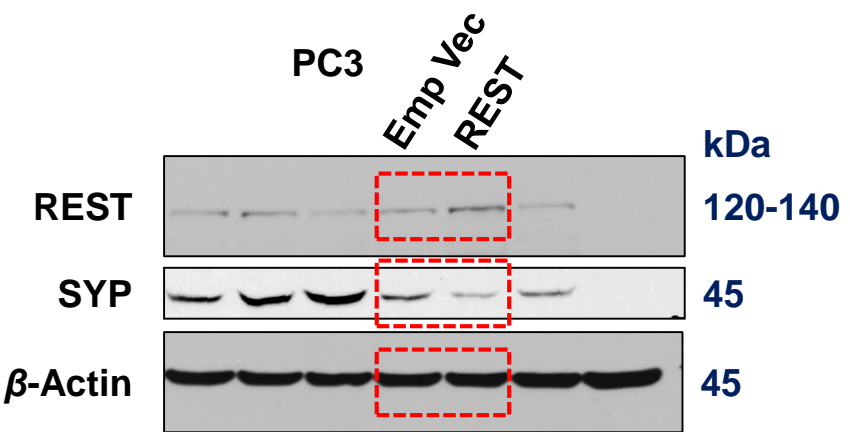

Fig. 2 E

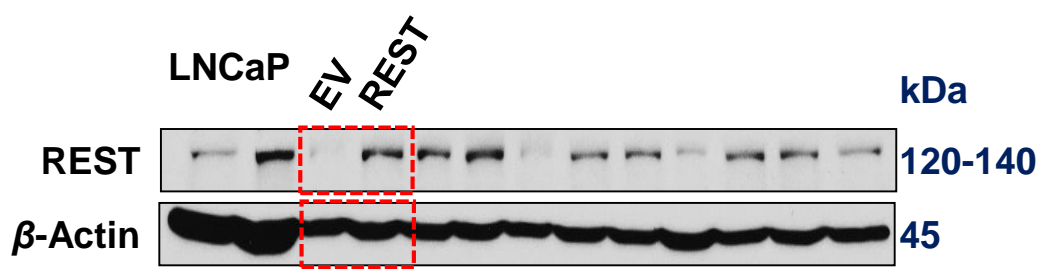

Fig. 2 G

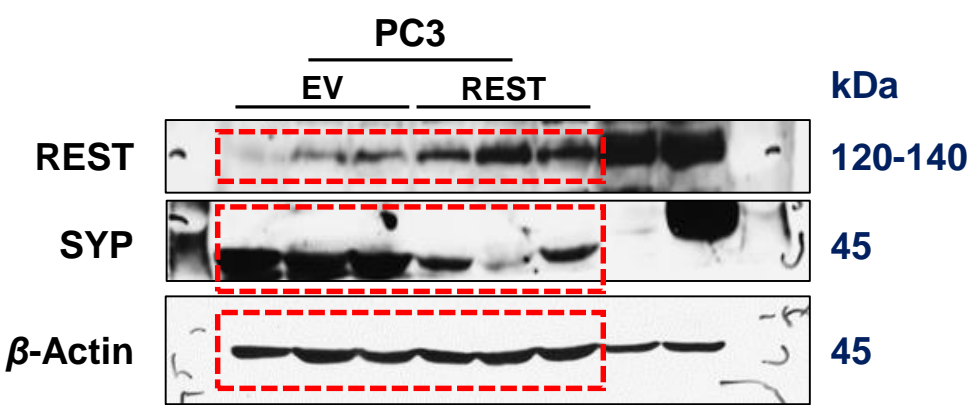

# Appendix Fig. 3

## Fig. 3 A

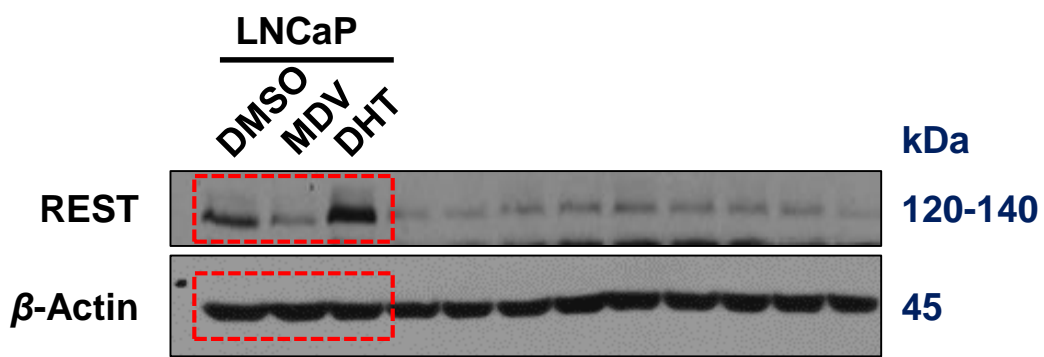

## Fig. 3 B

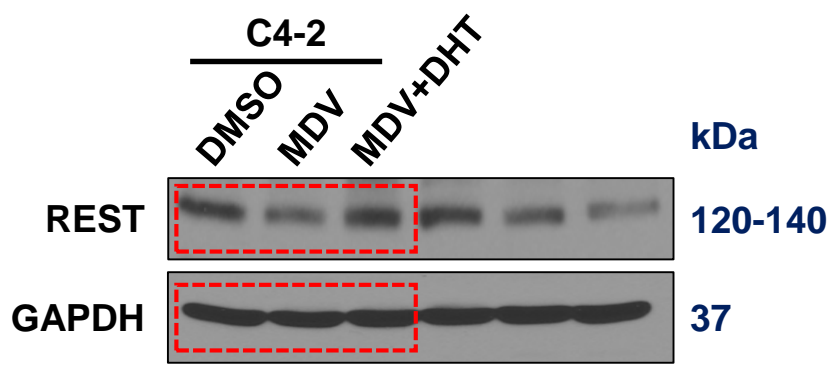

## Fig. 3 G

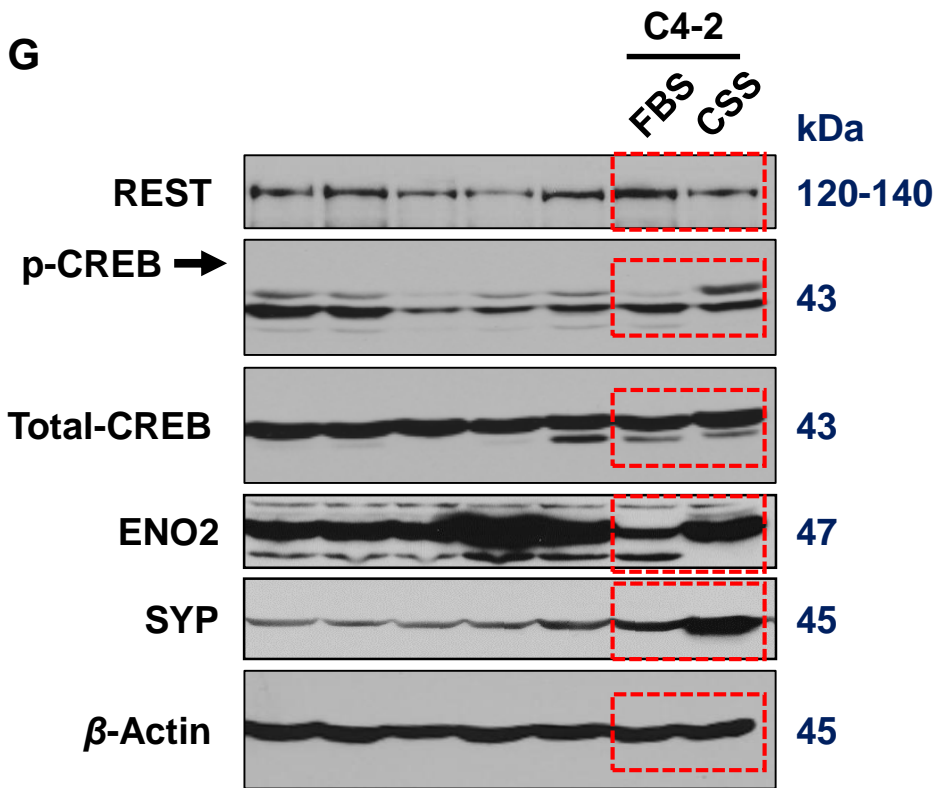

# Appendix Fig. 4

## Fig. 4 A

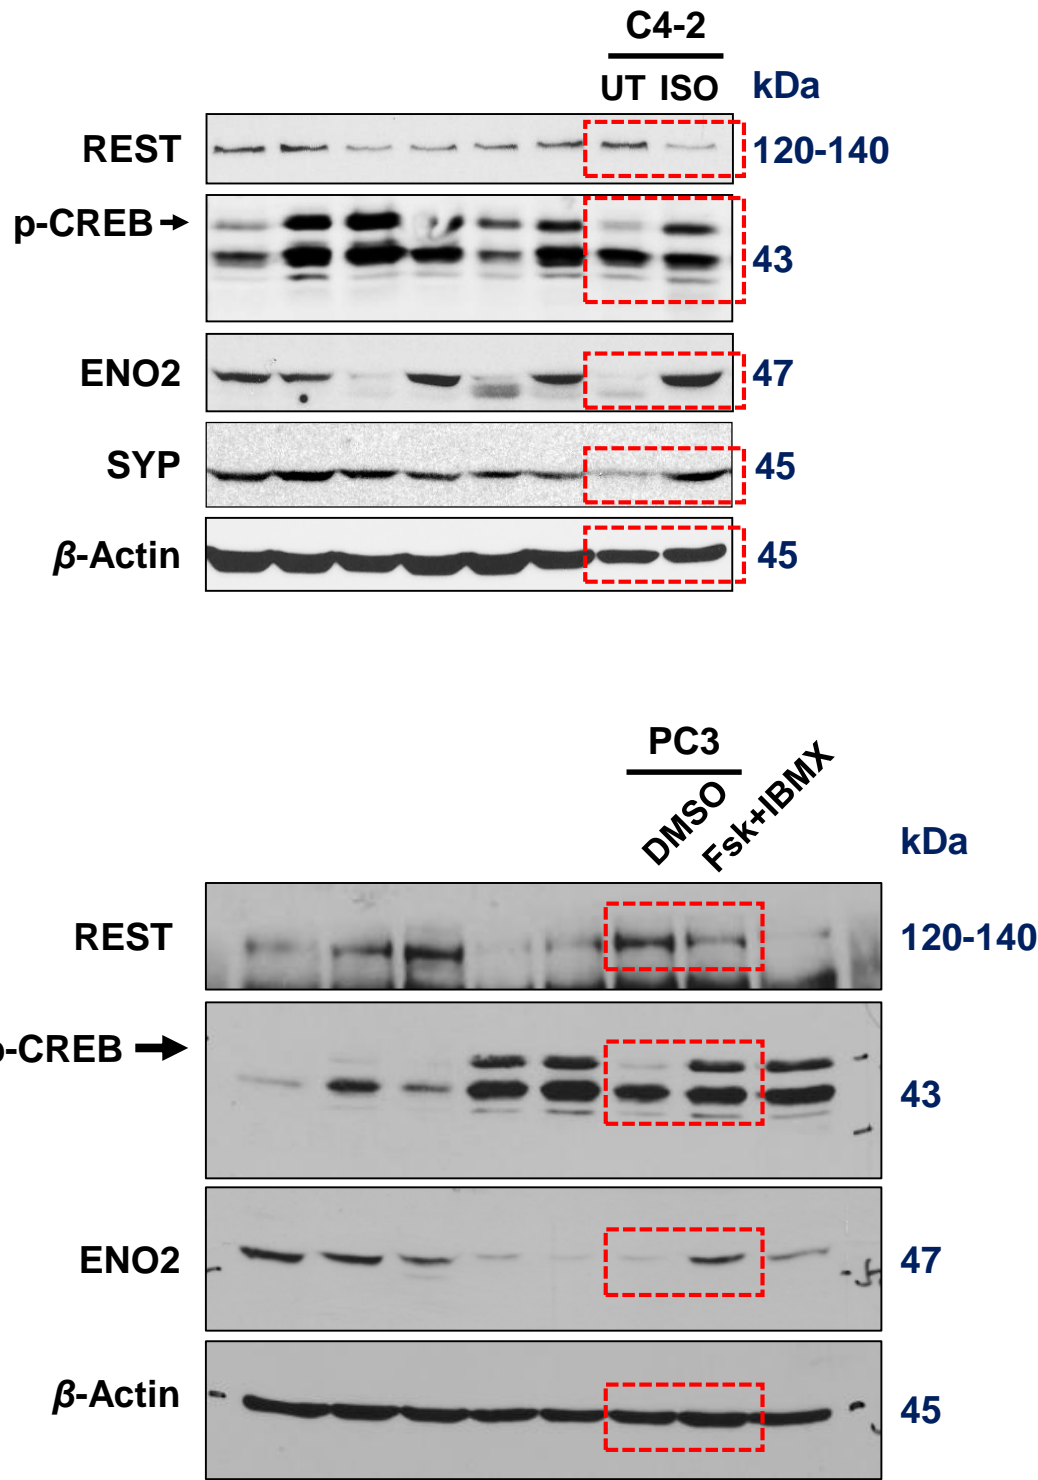

# Appendix Fig. 4

## Fig. 4 B

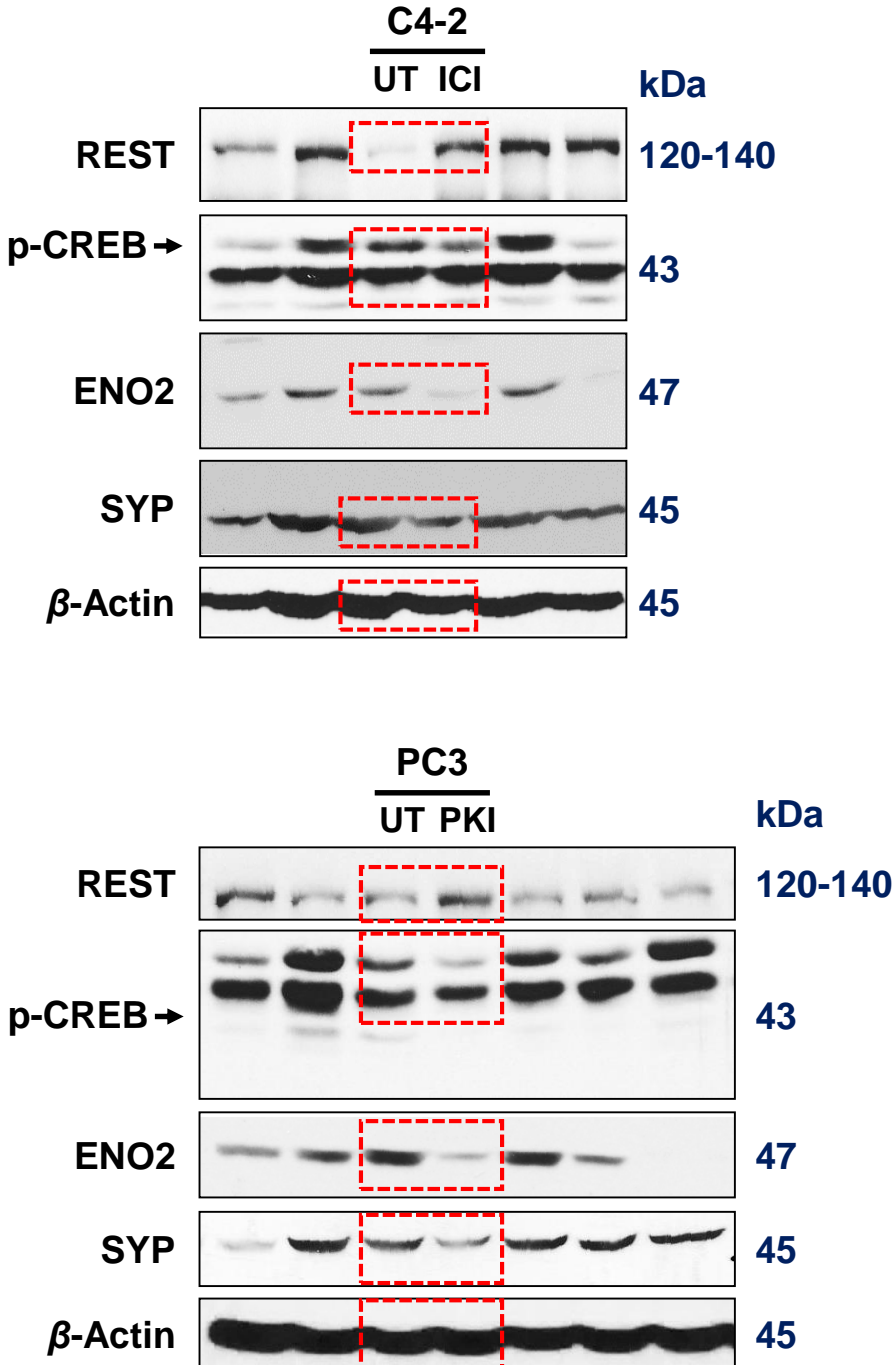

# Appendix Fig. 4

## Fig. 4 C

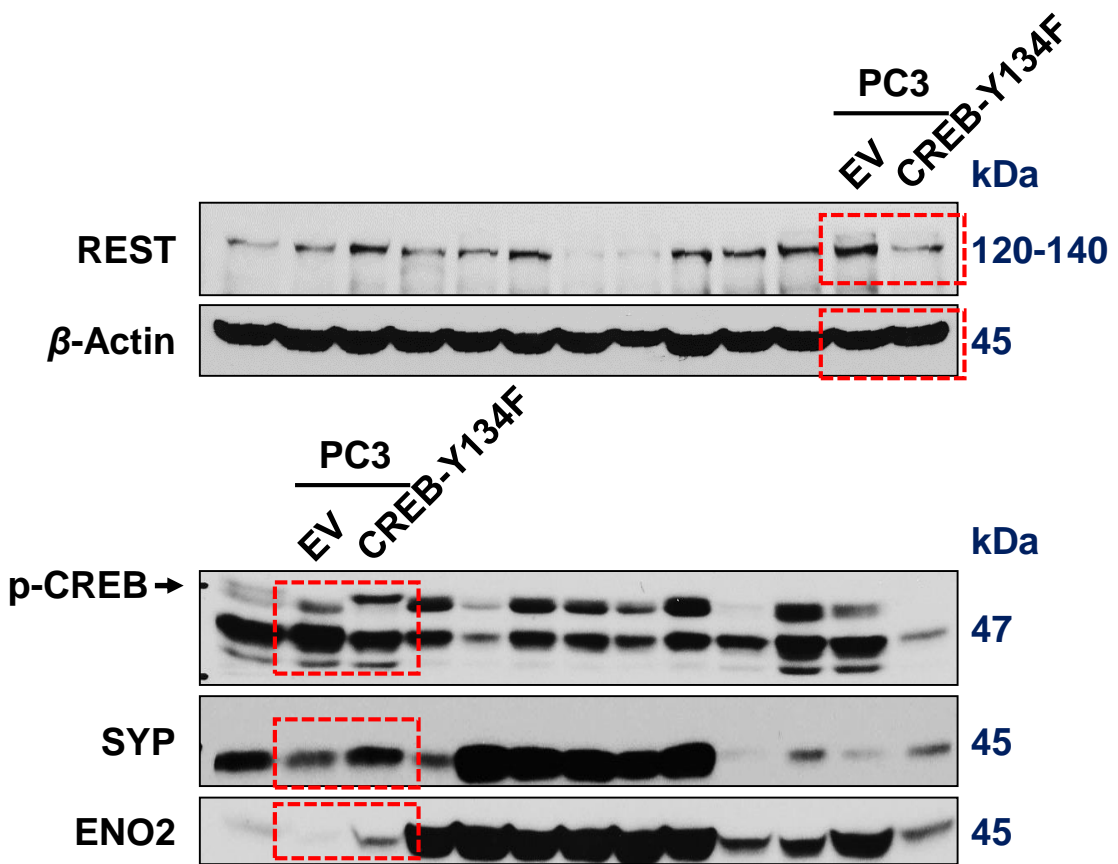

## Fig. 4 D

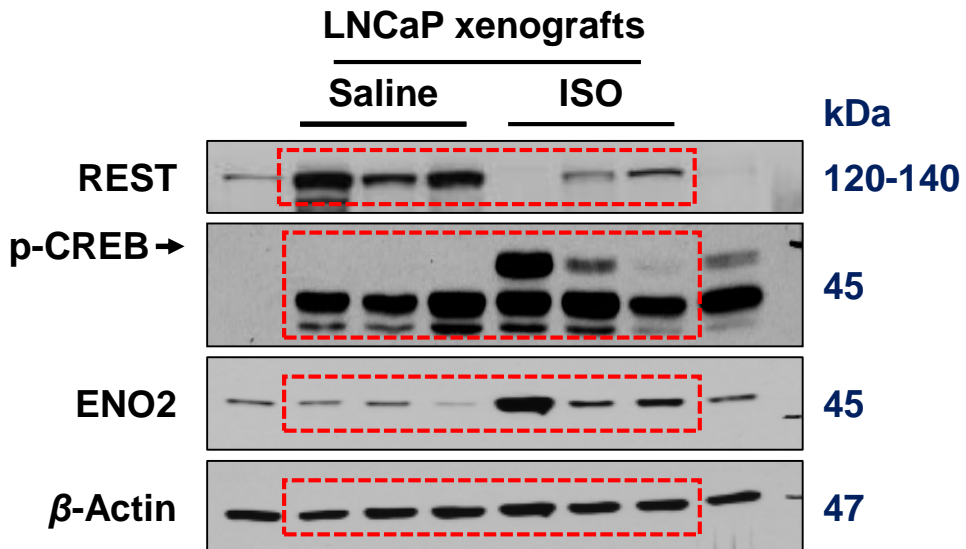

# Appendix Fig. 5

## Fig. 5 A

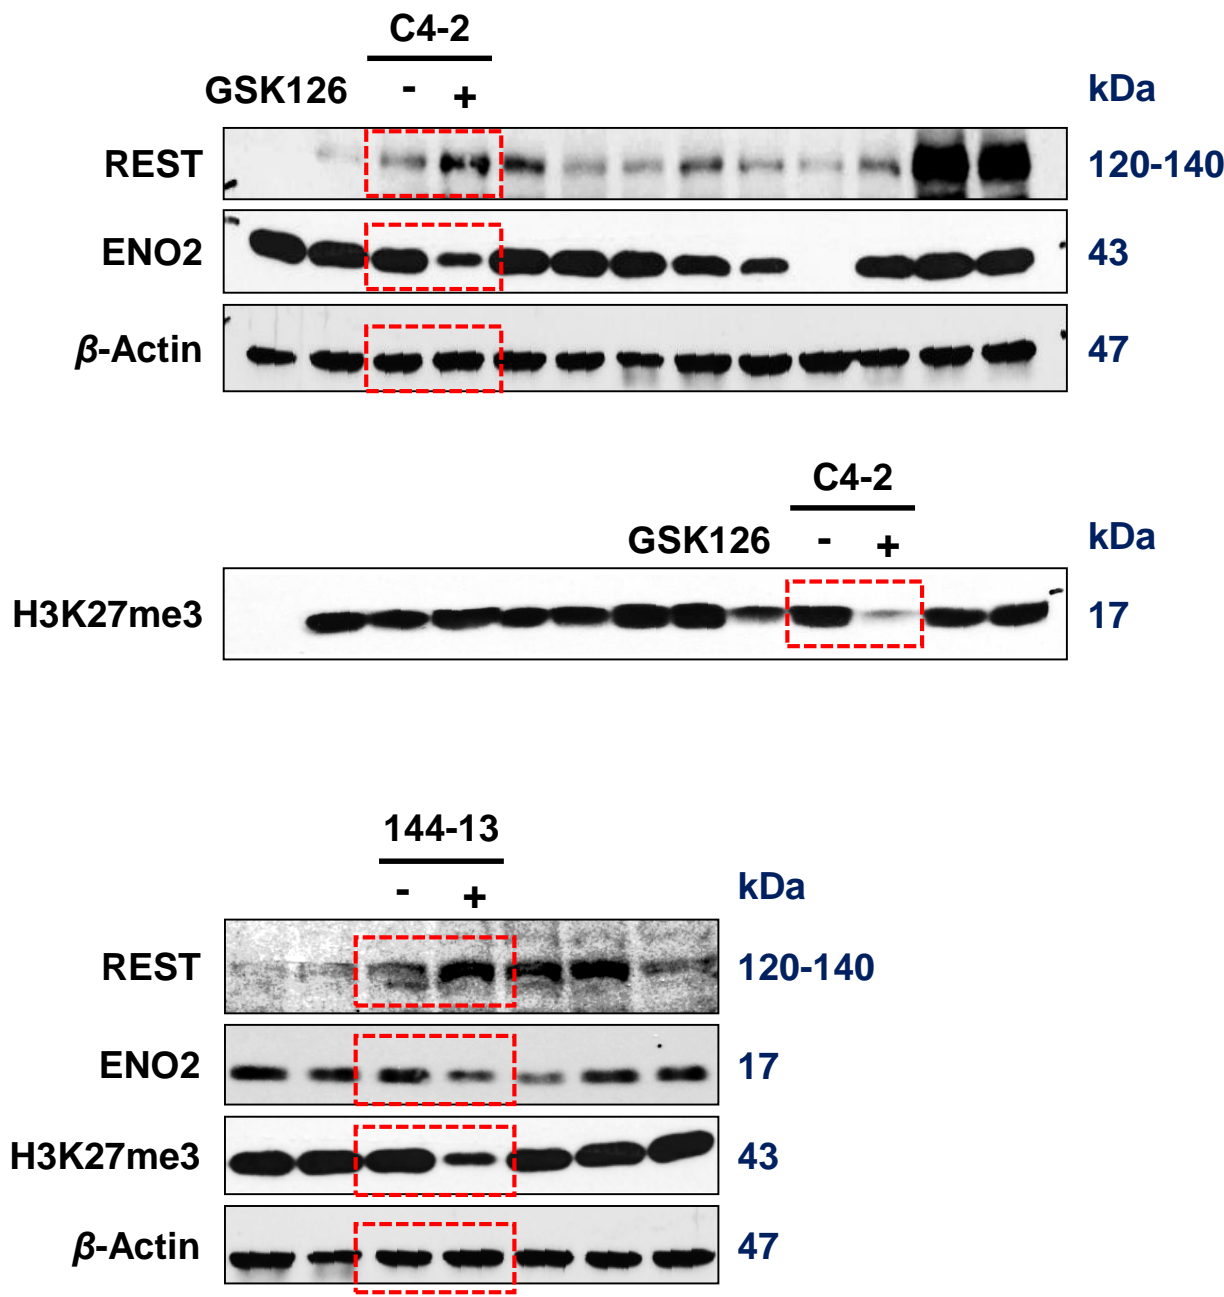

# Appendix Fig. 5

## Fig. 5 B

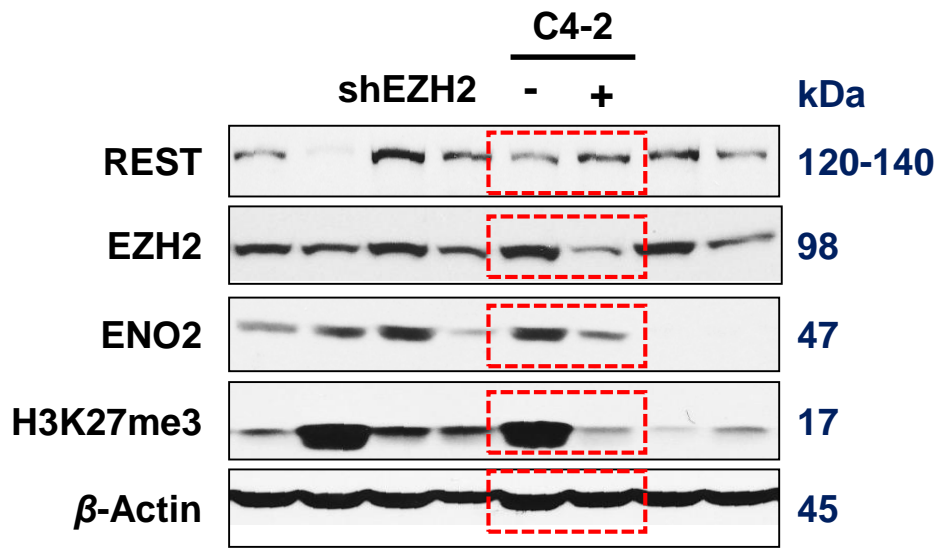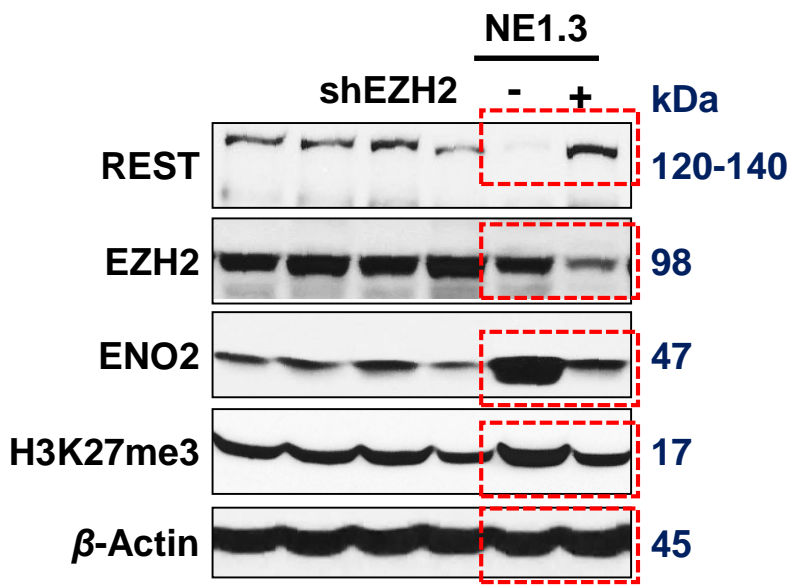



# Appendix Fig. 6

## Fig. 6 A

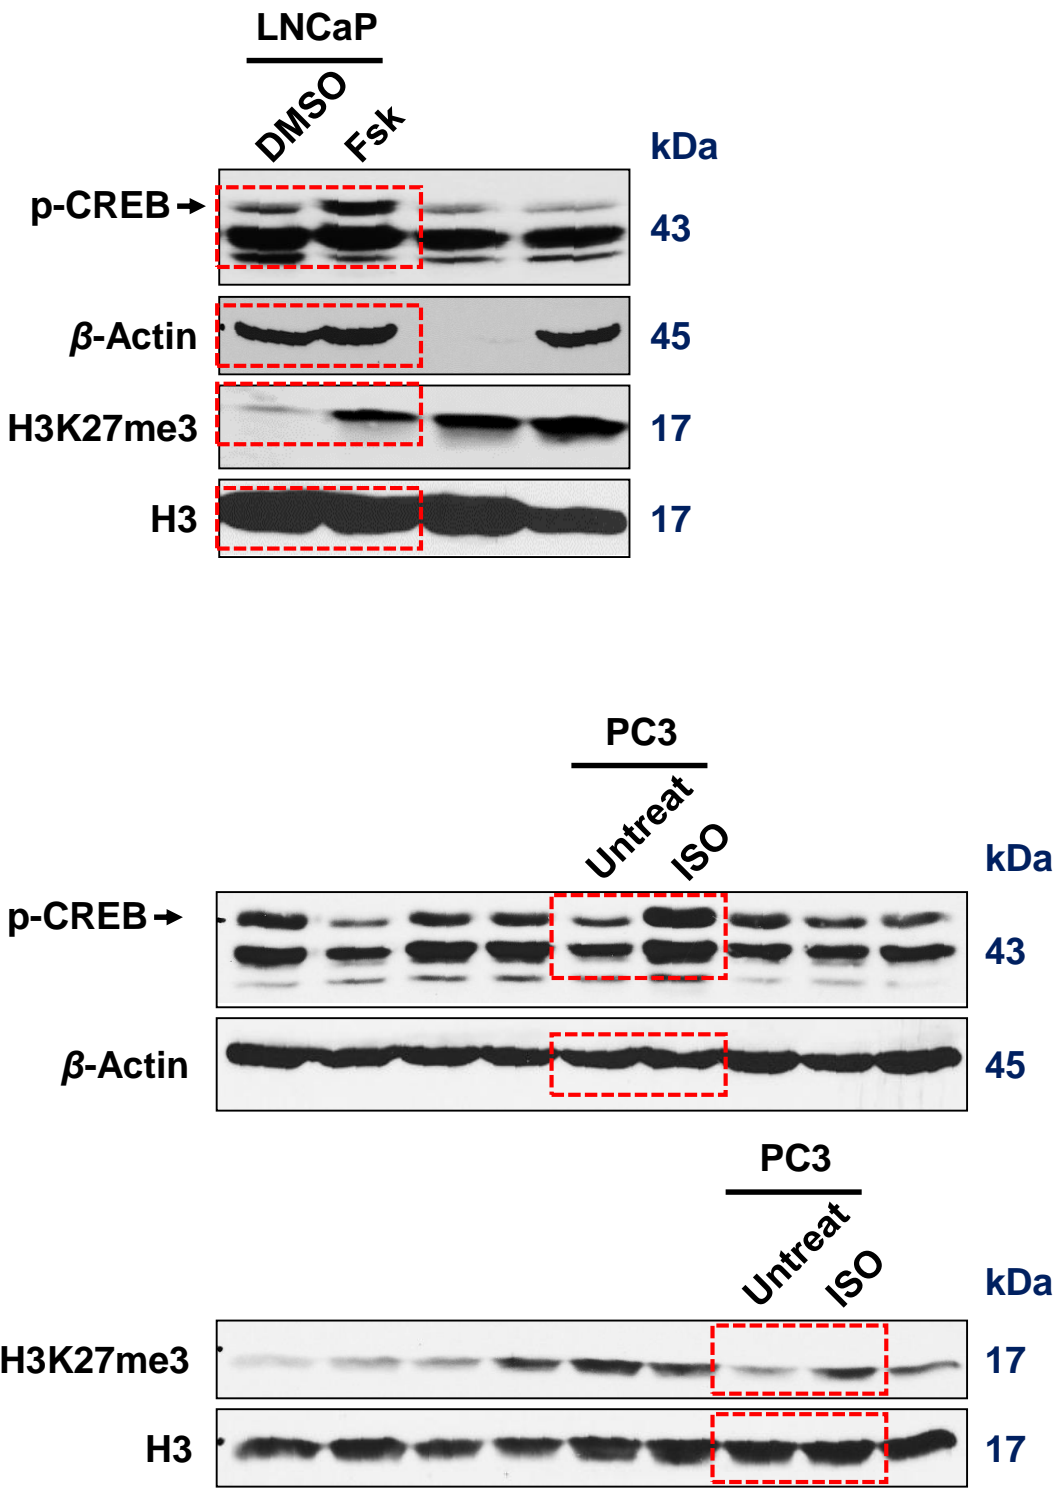

# Appendix Fig. 6

## Fig. 6 B

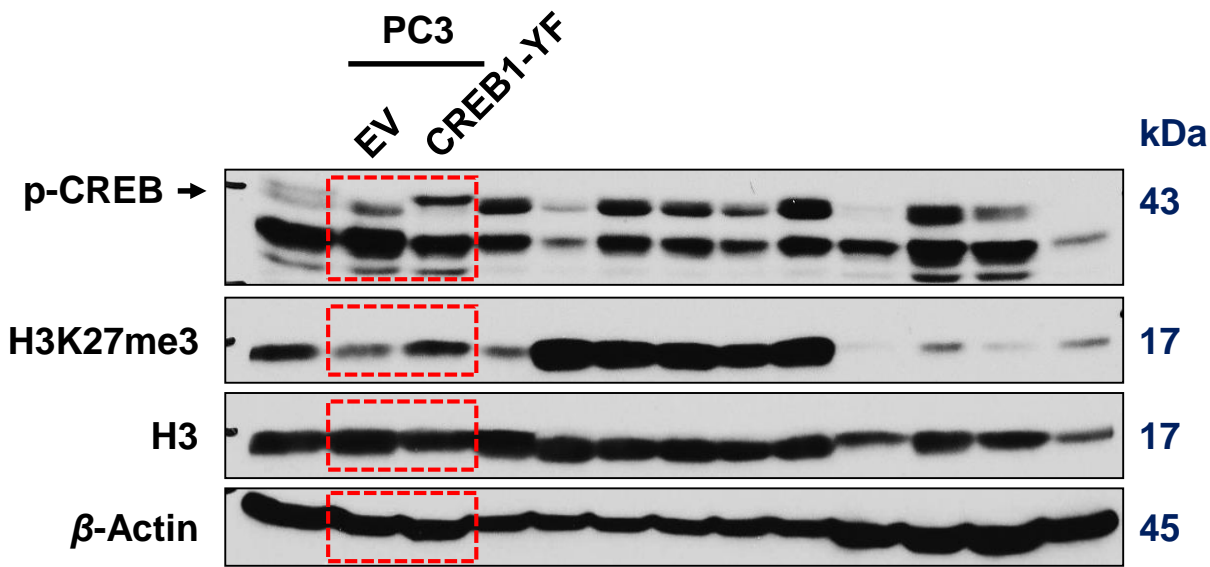

# Appendix Fig. 6

## Fig. 6 C

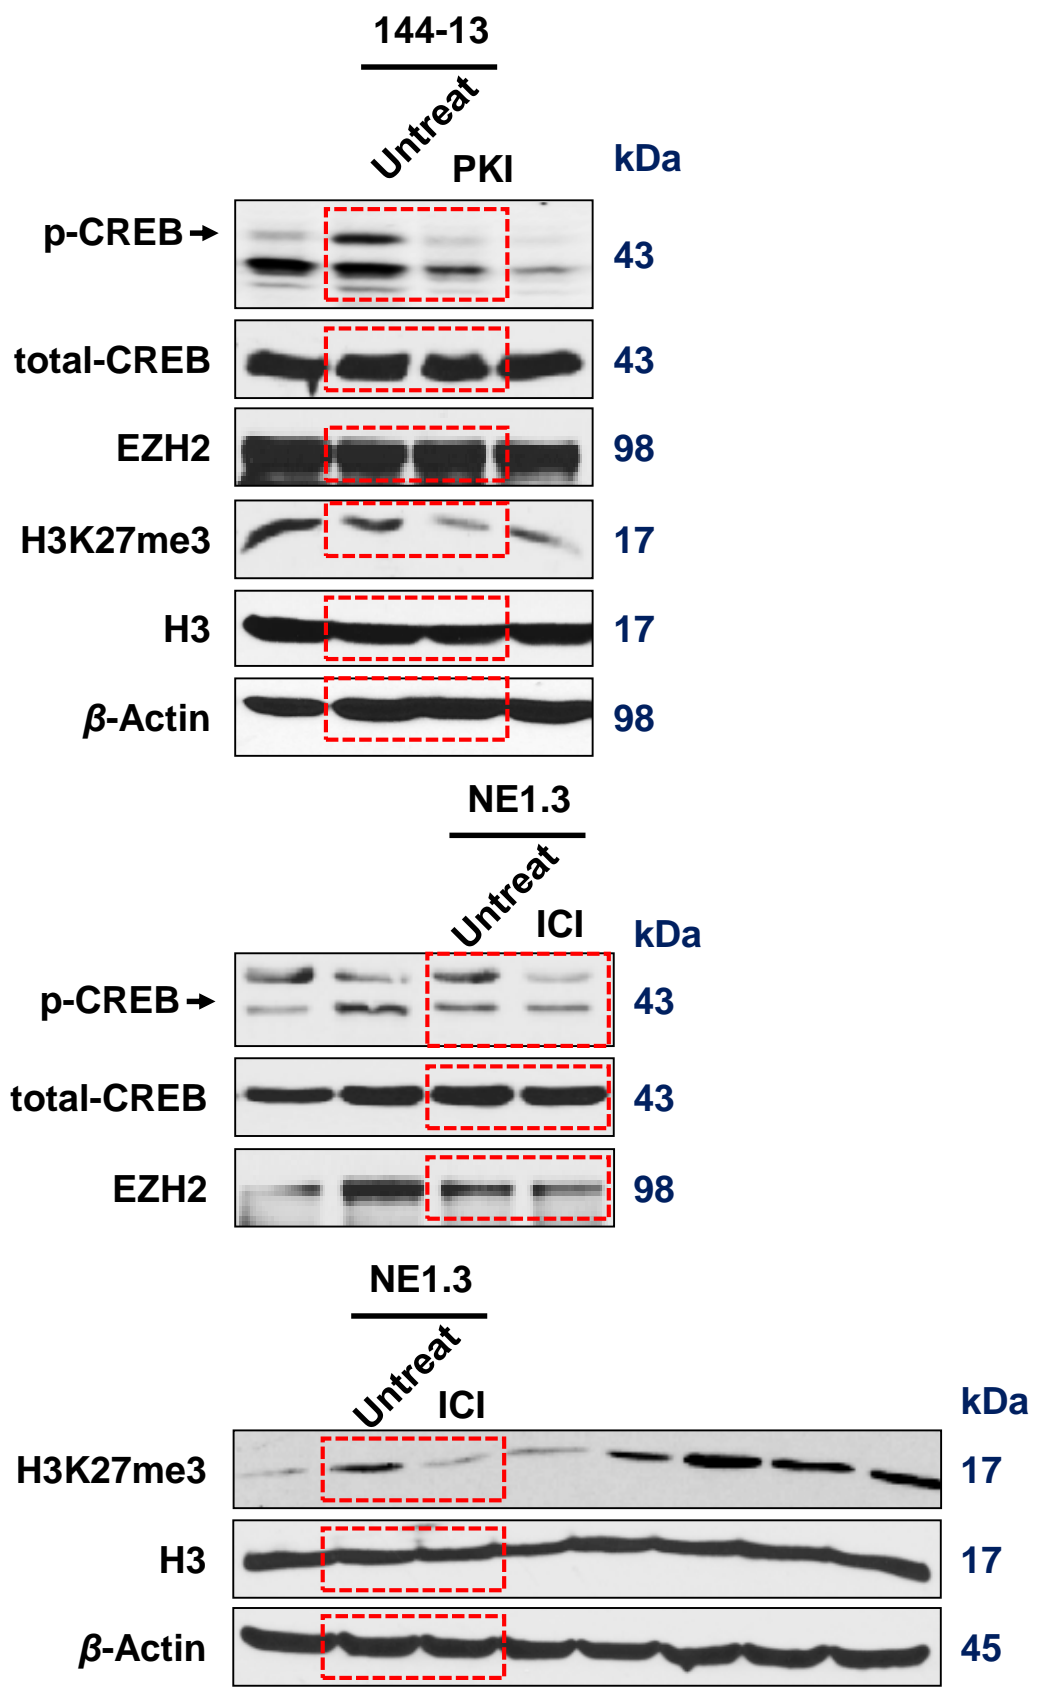

# Appendix Fig. 6

## Fig. 6 D

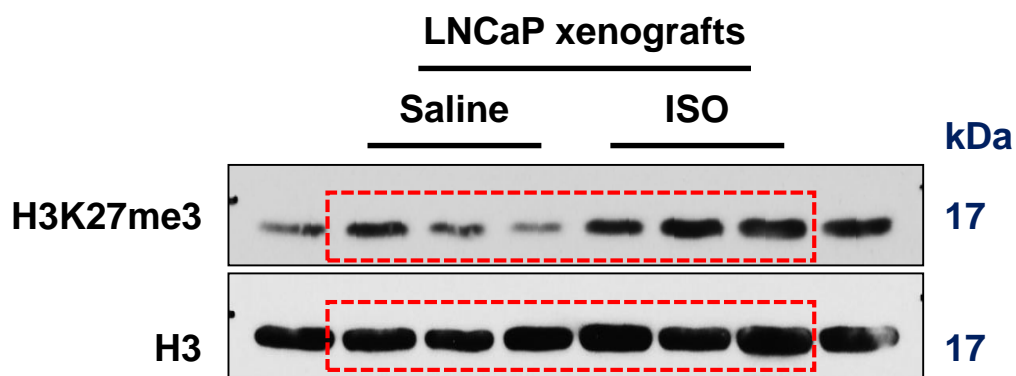

# Appendix Fig. 7

## Fig. 7 A

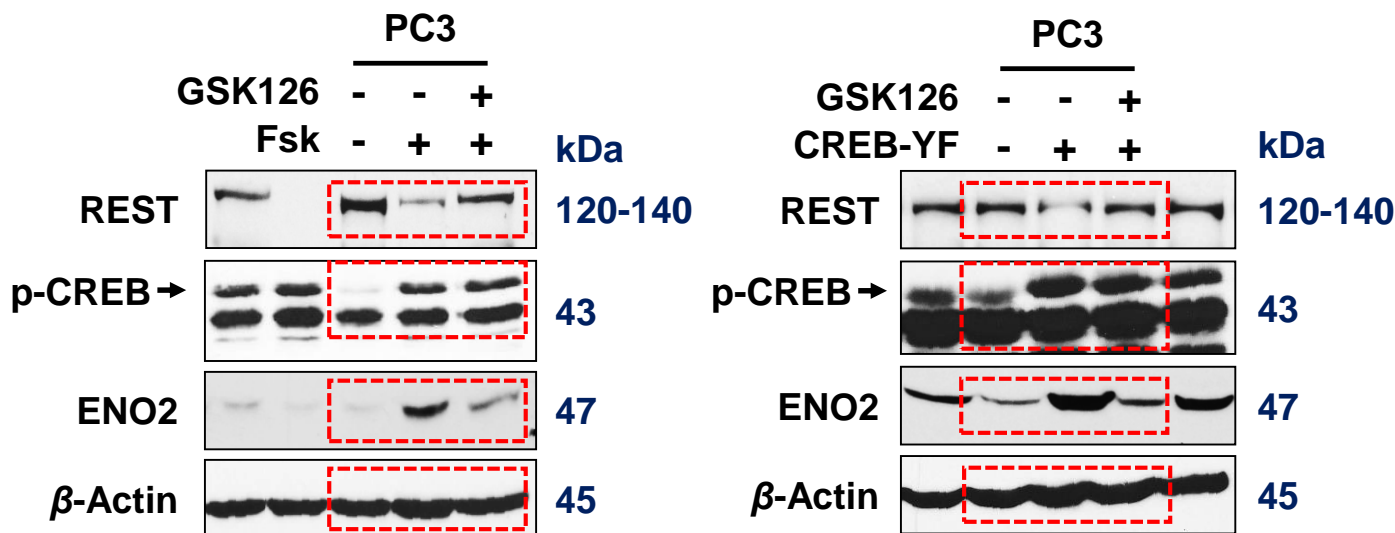

## Fig. 7 B

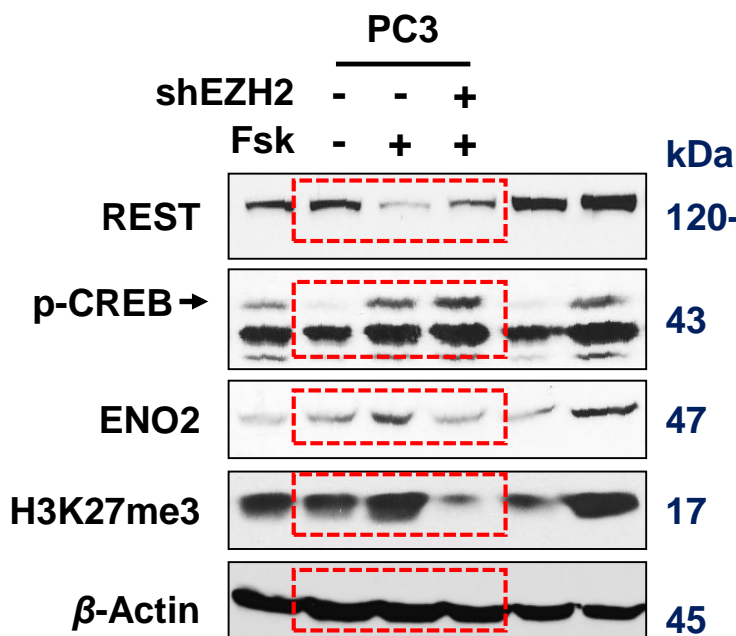

## Fig. 7 D

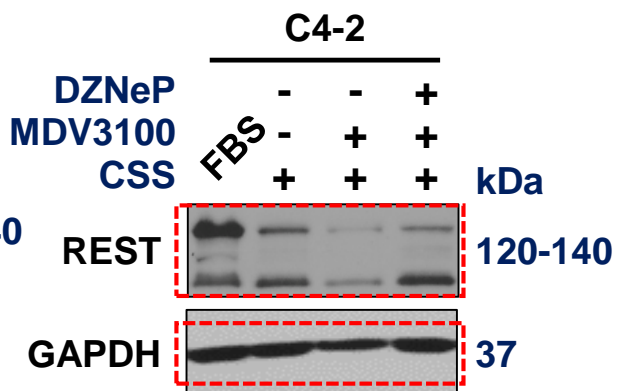

Appendix Fig. 7

Fig. 7 E

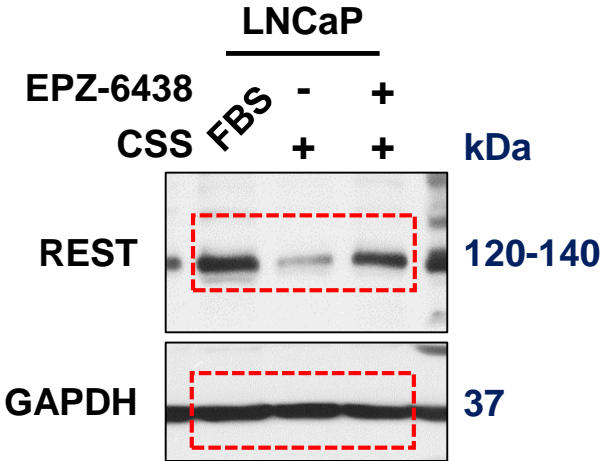

Supplement: 41420_2024_2031_MOESM6_ESM.pdf [file 41420_2024_2031_MOESM6_ESM.pdf]
